# Supplementary material for: No Adaptation of the Prion Strain in a Heterozygous Case of Variant Creutzfeldt-Jakob Disease
Source: PubMed Central journal article supplement (PMC7258451; doi:10.3201/eid2606.191116), 2020-06
Supplement: 19-1116-Techapp-s1.pdf [file 19-1116-Techapp-s1.pdf]

# No Adaptation of the Prion Strain in a Heterozygous Case of Variant Creutzfeldt-Jakob Disease

## Appendix

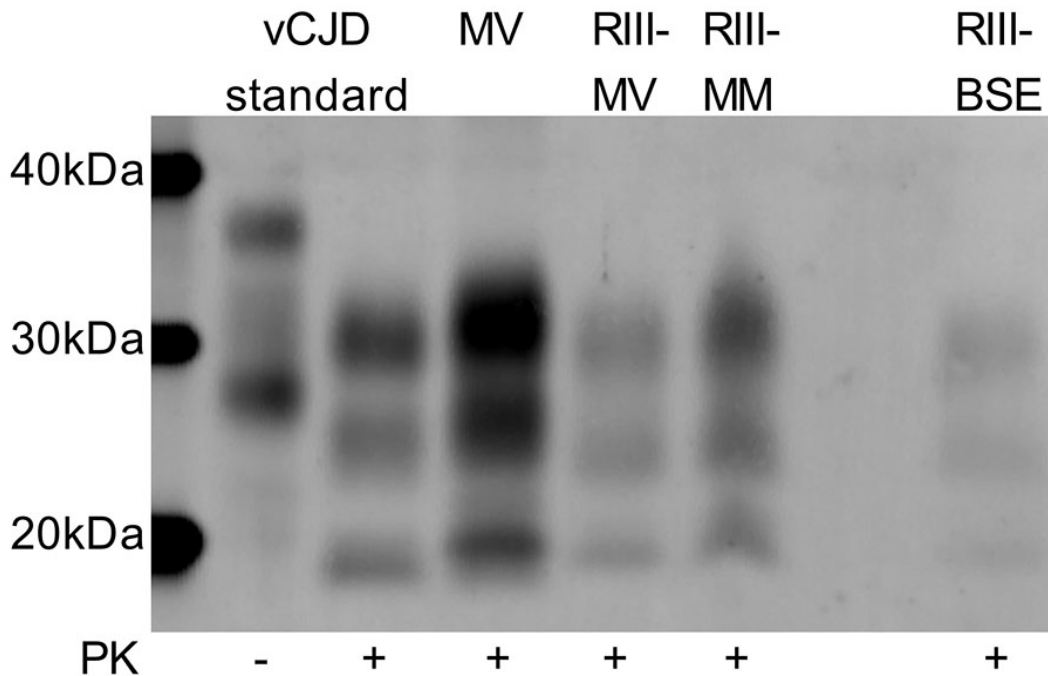

**Appendix Figure.** Western blot analyses of proteinase K resistant isoforms of PrP (PrP<sup>res</sup>) show similar Type 2B like profiles in representative RIII mice inoculated with the 129MV case, a typical 129MM case and BSE. A typical 129MM vCJD standard and the 129MV isolate are shown for reference. Blots were probed with monoclonal antibody 6H4 (1:5000). Approximate molecular mass is shown in kDa.
